# Supplementary material for: Association of gut microbiota with sort-chain fatty acids and inflammatory cytokines in diabetic patients with cognitive impairment: A cross-sectional, non-controlled study
Source: PubMed Central journal article supplement (PMC9355148; doi:10.3389/fnut.2022.930626), 2022-07-22
Supplement: Image_1.pdf [file Image_1.pdf]

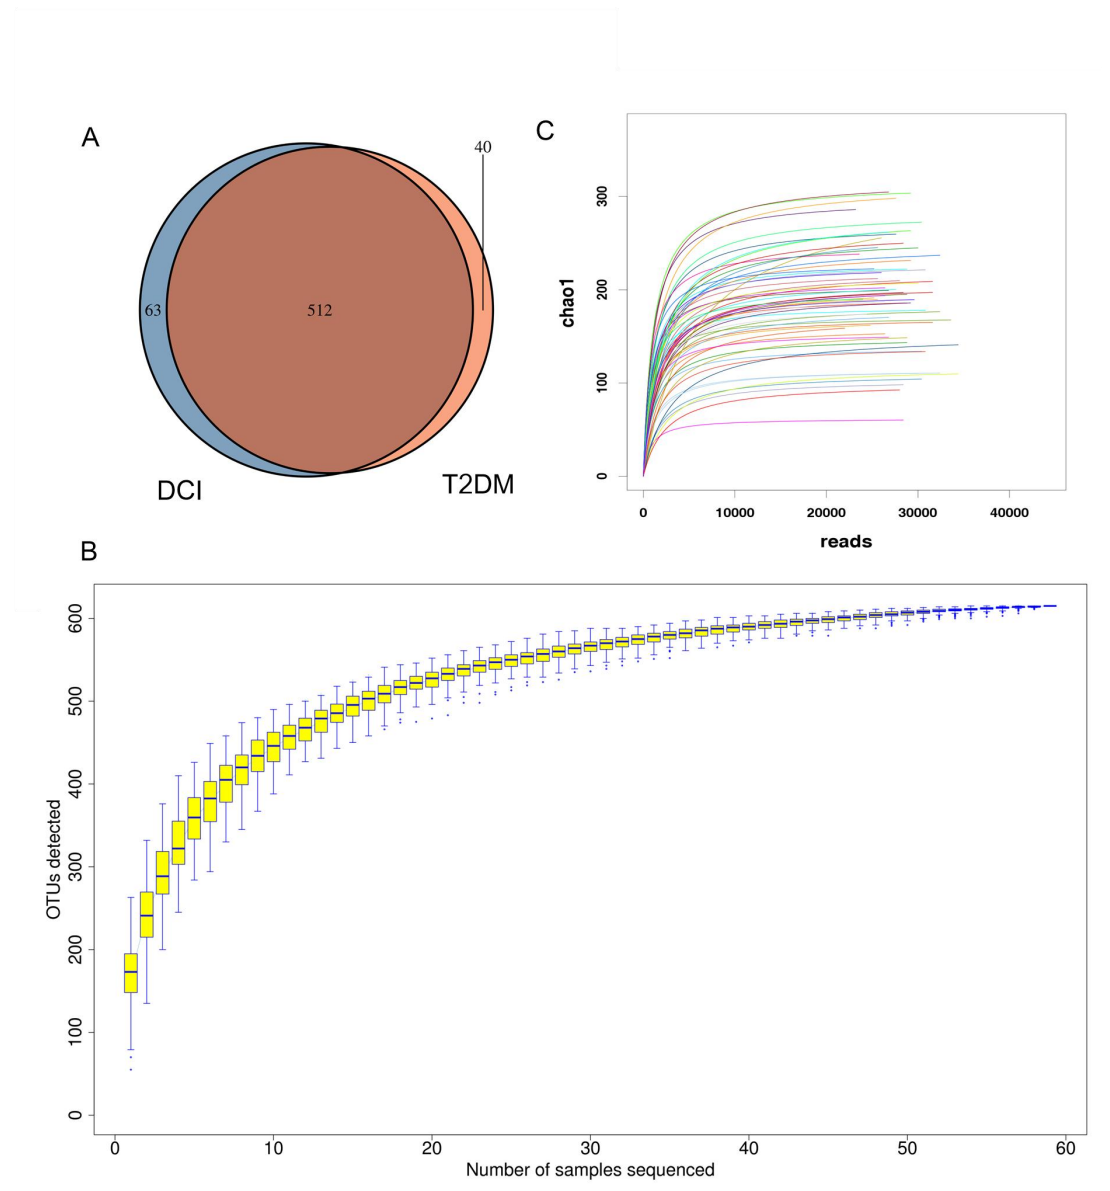

**FIGURE S1**

The  $\alpha$ -diversity and  $\beta$ -diversity of the fecal microbiome alteration in DCI and T2DM groups. **(A)** Venn diagram in DCI and T2DM groups. **(B)** Species accumulation curve of Specaccum showed the adequate sampling and high species richness. **(C)** Rarefaction curves based on the Chao 1 index showed the reasonable sequencing data and the sufficient sequencing depth.
